# Supplementary material for: Transcription Factor Binding Site Enrichment Analysis in Co-Expression Modules in Celiac Disease
Source: MDPI journal article supplement (doi:10.3390/genes9050245), 2018-05-10
Supplement: s1 [file s1]

## **Microarray data**

- Chronic exposure (E-MEXP-1828)
- Acute exposure (E-MEXP-1823)

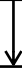

Probes to genes  
(medians)

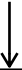

Keep more variable genes  
(DCGL R package)

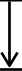

Classification of genes in modules  
(WGCNA R package)

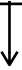

Based on modules from each condition

- Differential Co-expression Analysis  
(DCLR R package)

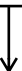

Enrichment analysis

- TFBS  
(Babelomics 4.3)
