# Supplementary figures and images for: Transcription Factor Binding Site Enrichment Analysis in Co-Expression Modules in Celiac Disease
Source: MDPI journal article supplement (doi:10.3390/genes9050245), 2018-05-10

A

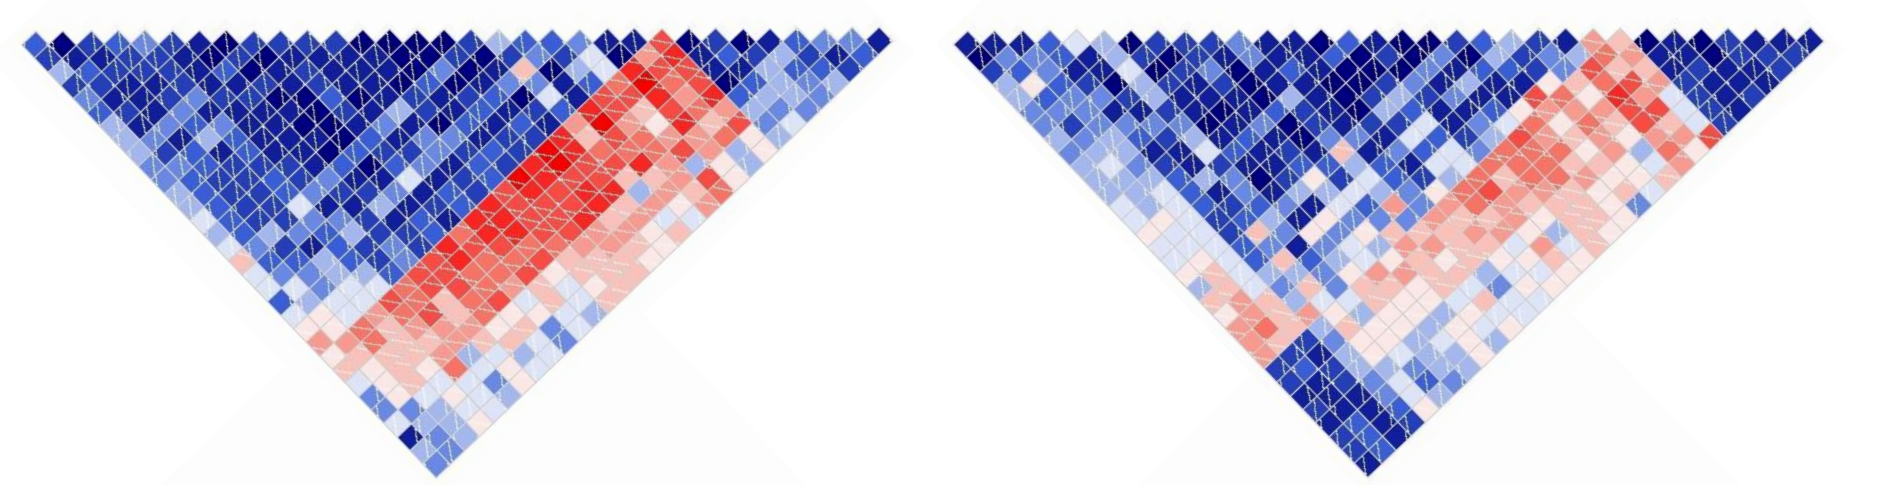

B

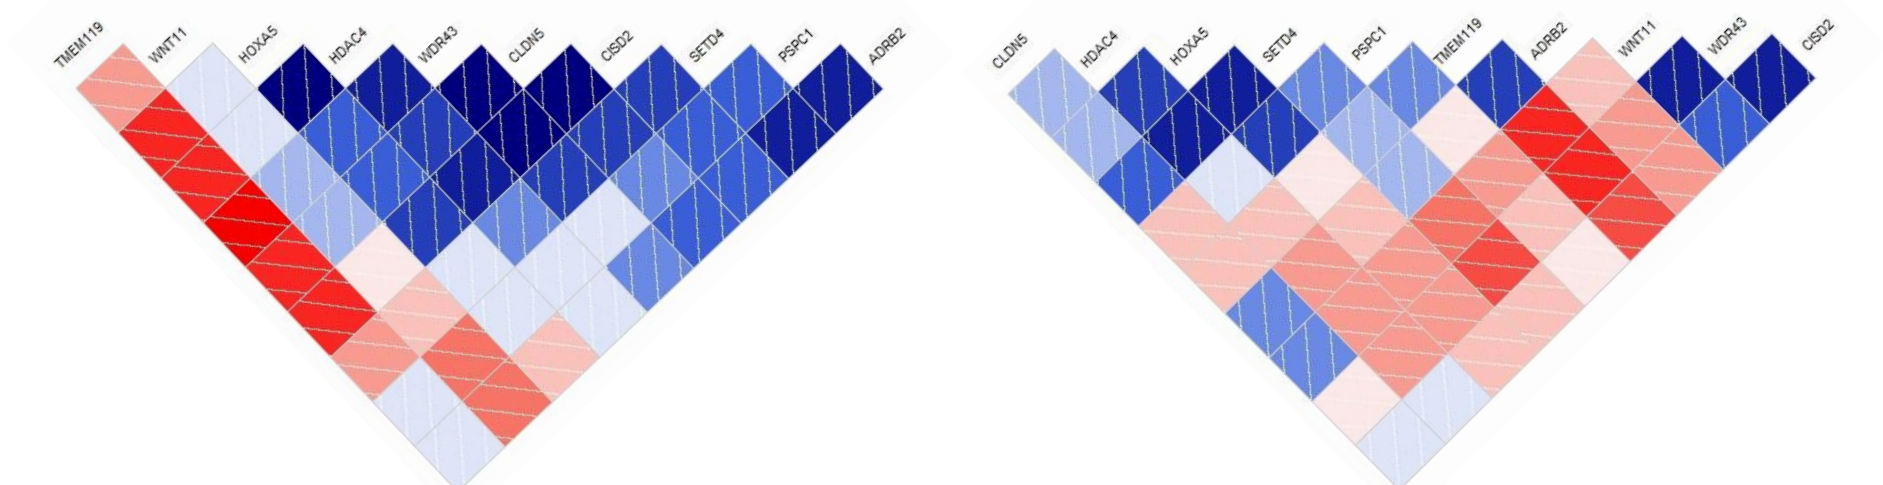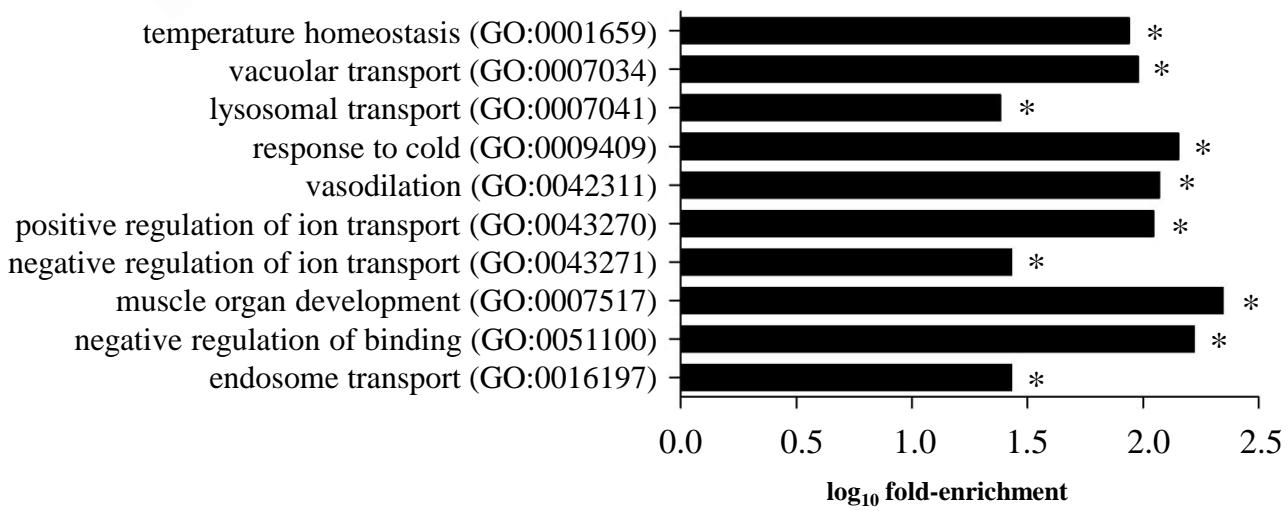

Supplement: s1 [file s1]
